# Supplementary material
Source: Royal Society of Chemistry journal article supplement (doi:10.1039/d6ta01093h)
Supplement: d6ta01093h1.pdf [file d6ta01093h1.pdf]

Supplementary information

**Rational Design of RuO<sub>2</sub>/0.5CeO<sub>2</sub> Heterostructure as an Efficient and Stable Electrocatalyst for Acidic Water Splitting**

Tenghao Liu<sup>abc</sup>, Quan Zhou<sup>\*d</sup>, Liu Yang<sup>d</sup>, Yining Zhang<sup>\*e</sup>, Rongyue Wang<sup>\*abc</sup> and Zhongwei Chen<sup>\*d</sup>

<sup>a</sup> National Engineering Research Center of Nonferrous Metals Materials and Products for New Energy, China GRINM Group Co., Ltd., Beijing 100088, China.

<sup>b</sup> GRINM (Guangdong) Institute for Advanced Materials and Technology, Foshan, 528000, China.

<sup>c</sup> General Research Institute for Nonferrous Metals, Beijing 100088, China.

<sup>d</sup> State Key Laboratory of Catalysis, Power Battery & Systems Research Center, Dalian Institute of Chemical Physics, Chinese Academy of Sciences, Dalian 110623, China.

<sup>e</sup> High-Performance Lithium-Ion Battery Research and Development Center, Yulin Innovation Institute of Clean Energy, Yulin, 719004, China.

\* To whom correspondence should be made.

E-mail: zhouquan2010@dicp.ac.cn; zhangyn@dnlyl.ac.cn; wangrongyue@grinm.com; zwchen@dicp.ac.cn

## Supplementary Figures

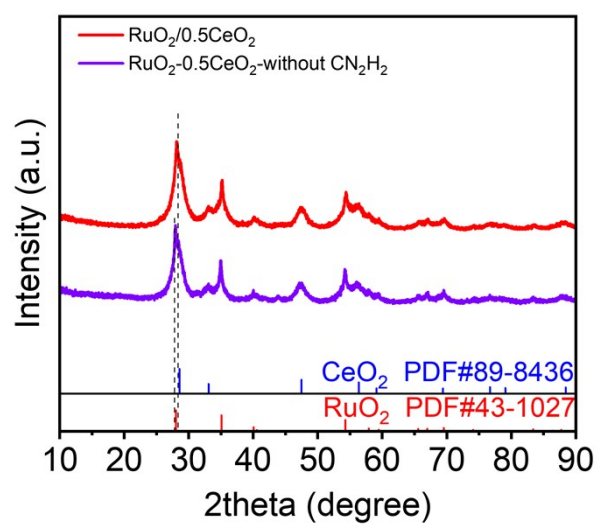

Fig. S1. XRD patterns of RuO<sub>2</sub>/0.5CeO<sub>2</sub> and RuO<sub>2</sub>-0.5CeO<sub>2</sub> (without CN<sub>2</sub>H<sub>2</sub> as precursor).

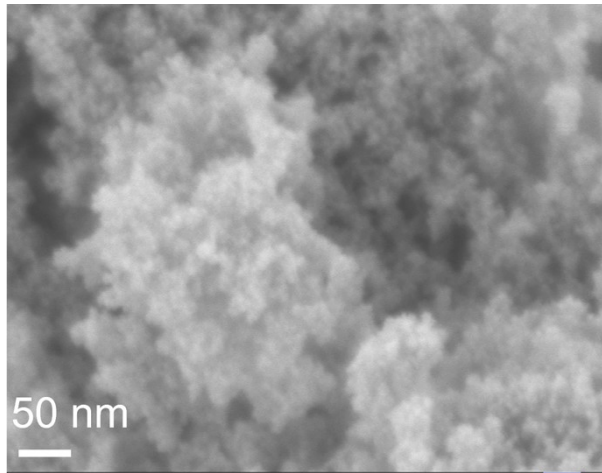

Fig. S2. SEM image of RuO<sub>2</sub>/0.5CeO<sub>2</sub>.

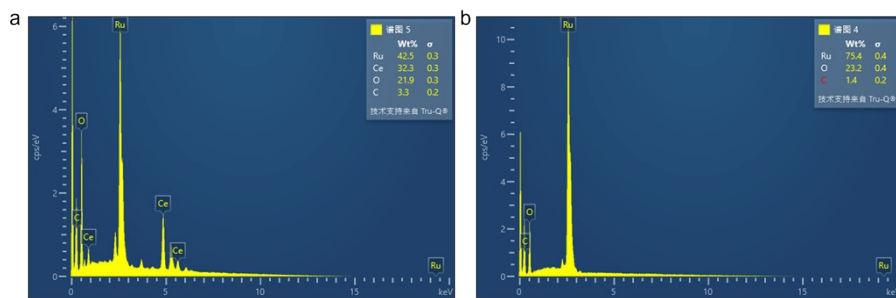

Fig. S3. SEM-EDS analysis of RuO<sub>2</sub>/0.5CeO<sub>2</sub> and commercial RuO<sub>2</sub>.

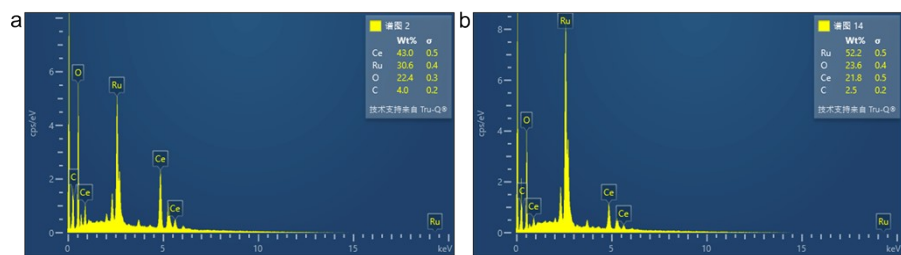

Fig. S4. SEM-EDS analysis of  $\text{RuO}_2/\text{CeO}_2$  and  $\text{RuO}_2/0.25\text{CeO}_2$ .

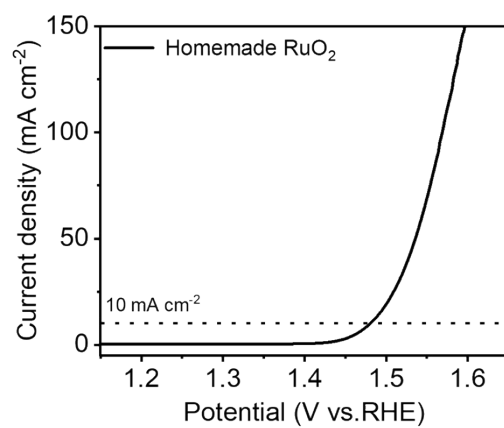

Fig. S5. LSV polarization curves of homemade RuO<sub>2</sub> with iR compensation.

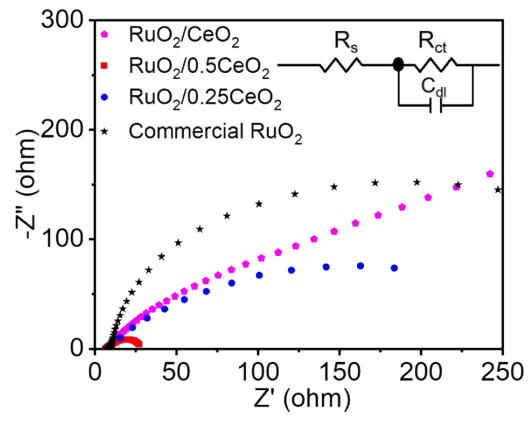

Fig. S6. EIS plot at a constant potential of 1.5 V vs. RHE.

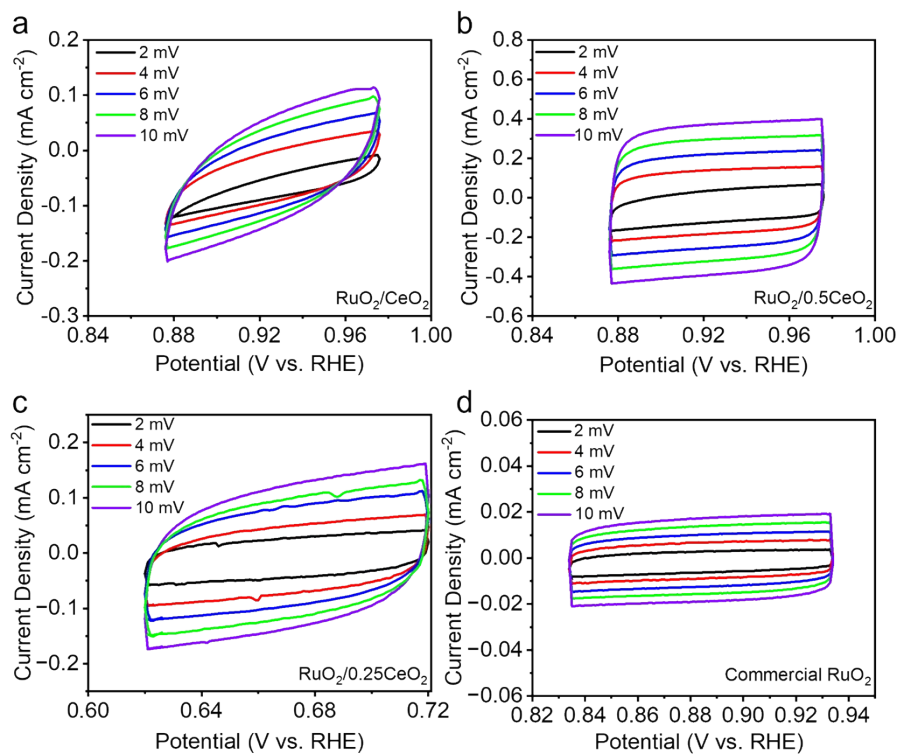

Fig. S7. Cyclic voltammograms curves of (a) RuO<sub>2</sub>/CeO<sub>2</sub>, (b) RuO<sub>2</sub>/0.5CeO<sub>2</sub>, (c) RuO<sub>2</sub>/0.25CeO<sub>2</sub>, and (d) commercial RuO<sub>2</sub> at scan rates from 2 to 10 mV s<sup>-1</sup> within the non-Faradaic potential range.

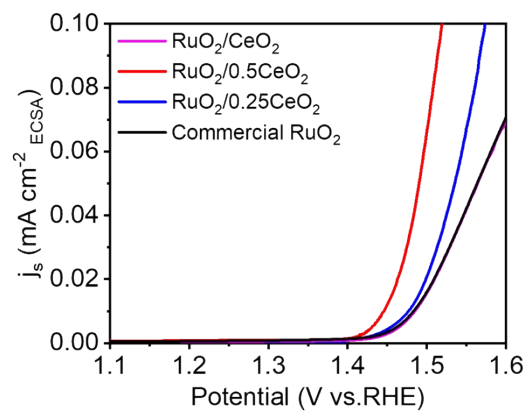

Fig. S8. OER polarization curves for RuO<sub>2</sub>/CeO<sub>2</sub>, RuO<sub>2</sub>/0.5CeO<sub>2</sub>, RuO<sub>2</sub>/0.25CeO<sub>2</sub>, commercial RuO<sub>2</sub> in acid media. The activities of catalysts were normalized to ECSA.

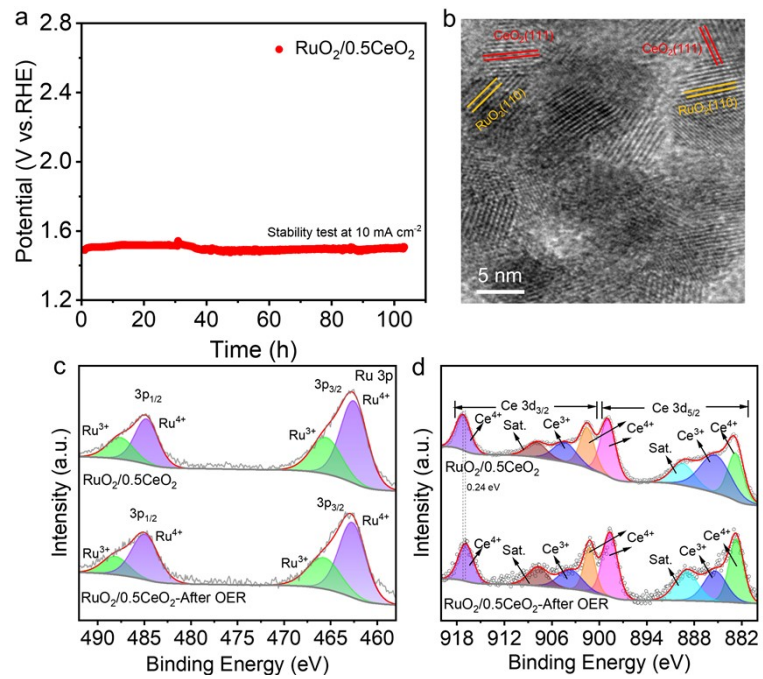

Fig. S9. (a) 100-hour durability test of RuO<sub>2</sub>/0.5CeO<sub>2</sub>. (b) High-magnification TEM of RuO<sub>2</sub>/0.5CeO<sub>2</sub> after 100-hour durability test. High-resolution XPS spectra of (c) Ru 3p and (d) Ce 3d for RuO<sub>2</sub>/0.5CeO<sub>2</sub> before and after 100-hour durability test.

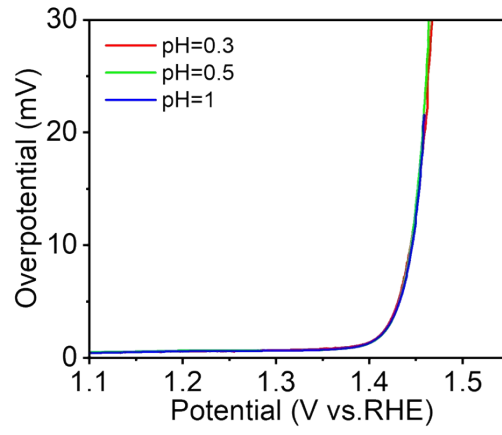

Fig. S10. OER polarization curves for RuO<sub>2</sub>/0.5CeO<sub>2</sub> in electrolytes of different pH.

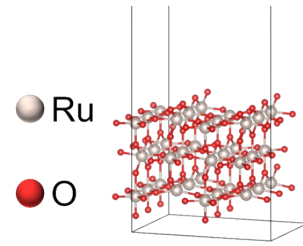

Fig. S11. Crystal structure model of RuO<sub>2</sub>.

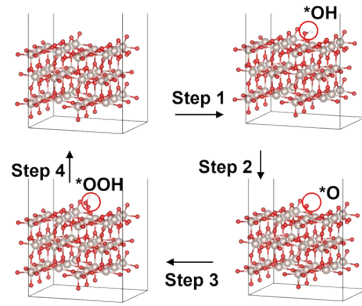

Fig. S12. Four-step AEM of OER for RuO<sub>2</sub>.

## Supplementary Tables

Table S1. The mass percent of Ru, Ce, O and C for RuO<sub>2</sub>/0.5CeO<sub>2</sub> and Commercial RuO<sub>2</sub> measured by SEM-EDS and ICP-OES.

| Sample                                 | SEM-EDS  |          |         |         | ICP-OES               |
|----------------------------------------|----------|----------|---------|---------|-----------------------|
|                                        | Ru (wt%) | Ce (wt%) | O (wt%) | C (wt%) | Weight ratio of Ru/Ce |
| RuO <sub>2</sub> /CeO <sub>2</sub>     | 30.6     | 43.0     | 22.4    | 4.0     | 0.71                  |
| RuO <sub>2</sub> /0.5CeO <sub>2</sub>  | 42.4     | 31.3     | 21.93   | 3.2     | 1.43                  |
| RuO <sub>2</sub> /0.25CeO <sub>2</sub> | 52.2     | 21.8     | 23.6    | 2.5     | 2.46                  |
| Commercial RuO <sub>2</sub>            | 75.39    | \        | 23.2    | 1.4     | \                     |

Table S2. Binding energy positions and relative concentrations of O 1s for RuO<sub>2</sub>/0.5CeO<sub>2</sub> and RuO<sub>2</sub> from high-resolution XPS analysis.

| Sample                                | Binding energy positions (eV) |        |                  |         | Relative concentrations (%) |       |                  |         |
|---------------------------------------|-------------------------------|--------|------------------|---------|-----------------------------|-------|------------------|---------|
|                                       | O <sub>L</sub>                | -OH    | H <sub>2</sub> O | C=O/C-O | O <sub>L</sub>              | -OH   | H <sub>2</sub> O | C=O/C-O |
| RuO <sub>2</sub> /0.5CeO <sub>2</sub> | 529.45                        | 530.82 | 532.02           | 533.19  | 28.15                       | 40.69 | 22.48            | 8.68    |
| RuO <sub>2</sub>                      | 529.31                        | 530.26 | 531.57           | 533.16  | 41.67                       | 32.26 | 20.25            | 5.82    |

Table S3. Summary of OER performance of state-of-the-art Ru-based catalysts.

| Catalyst                                  | $\eta_{10}$<br>(mV) | Stability<br>(h@10 mA cm <sup>-2</sup> ) | PEMWE<br>(V@1 A cm <sup>-2</sup> ) | PEMWE                                             | Reference        |
|-------------------------------------------|---------------------|------------------------------------------|------------------------------------|---------------------------------------------------|------------------|
|                                           |                     |                                          |                                    | Durability (h@mA cm <sup>-2</sup> ) <sup>2)</sup> |                  |
| <b>RuO<sub>2</sub>/0.5CeO<sub>2</sub></b> | <b>214</b>          | <b>550</b>                               | <b>1.59</b>                        | <b>300 h@500 mA cm<sup>-2</sup></b>               | <b>This Work</b> |
| h-RuO <sub>2-6</sub>                      | 247                 | 600                                      | 1.63                               | 130 h@200 mA cm <sup>-2</sup>                     | <sup>1</sup>     |

|                                                                       |     |      |                            |                               |    |
|-----------------------------------------------------------------------|-----|------|----------------------------|-------------------------------|----|
| MD-RuZrCoCrCeO <sub>2</sub>                                           | 179 | 800  | 1.66                       | 600 h@200 mA cm <sup>-2</sup> | 2  |
| Ru-Co <sub>3</sub> O <sub>4-x</sub>                                   | 198 | 230  | 1.85                       | 200 h@500 mA cm <sup>-2</sup> | 3  |
| RuO <sub>2</sub> @NCC                                                 | 215 | 327  | 1.65                       | 400 h@250 mA cm <sup>-2</sup> | 4  |
| Ru <sub>clusters</sub> /ZnCo <sub>2</sub> O <sub>4</sub>              | 200 | 725  | 1.697                      | 275 h@200 mA cm <sup>-2</sup> | 5  |
| RuO <sub>x</sub> -GDY                                                 | 193 | 300  | 1.73                       | 200 h@100 mA cm <sup>-2</sup> | 6  |
| a-Ge-RuO <sub>2</sub>                                                 | 205 | 500  | 1.62                       | 400 h@200 mA cm <sup>-2</sup> | 7  |
| RuIr-Co <sub>3</sub> O <sub>4</sub>                                   | 220 | 610  | 1.67@0.5A cm <sup>-2</sup> | 500 h@100 mA cm <sup>-2</sup> | 8  |
| Tm-RuO <sub>2</sub>                                                   | 201 | 300  | 1.84                       | N.A.                          | 9  |
| Mn-RuO <sub>2</sub>                                                   | 209 | 180  | 1.9                        | 40 h@100 mA cm <sup>-2</sup>  | 10 |
| H-Mn <sub>0.1</sub> Ru <sub>0.9</sub> O <sub>2</sub>                  | 169 | 500  | 1.65                       | 400 h@500 mA cm <sup>-2</sup> | 11 |
| Y-RuO <sub>2</sub>                                                    | 227 | 40   | 1.59                       | 100 h@200 mA cm <sup>-2</sup> | 12 |
| RuBa <sub>x</sub> Co <sub>3-x</sub> O <sub>4</sub>                    | 219 | N.A. | N.A.                       | 50 h@50 mA cm <sup>-2</sup>   | 13 |
| W <sub>0.2</sub> Er <sub>0.1</sub> Ru <sub>0.7</sub> O <sub>2-δ</sub> | 168 | 250  | N.A.                       | N.A.                          | 14 |
| Mn <sub>0.73</sub> Ru <sub>0.27</sub> O <sub>2-δ</sub>                | 208 | 10   | N.A.                       | N.A.                          | 15 |
| SSPt-RuO <sub>2</sub> HNSs                                            | 228 | 100  | N.A.                       | N.A.                          | 16 |

Table S4. Concentration of Ru and Ce in the electrolyte and their mass loss percentages after chronopotentiometry stability tests.

| Sample                                | Sample amount      | Concentrations<br>of<br>Ru/Ce (μg mL <sup>-1</sup> ) | Loss mass percent of Ru/Ce |
|---------------------------------------|--------------------|------------------------------------------------------|----------------------------|
| RuO <sub>2</sub> /0.5CeO <sub>2</sub> | 1mg<br>(0.42mg Ru) | 0.013/1.43                                           | 0.115%/16.4%               |
| Commercial RuO <sub>2</sub>           | 1mg<br>(0.75mg Ru) | 0.037                                                | 0.45%                      |

Table S5. Comparison of representative previously reported Ru-CeO<sub>2</sub> heterostructures and Ce-modified Ru catalysts for acidic OER.

| Catalyst                                             | Synthesis method               | Support type  | $\eta_{10}$ (mV) | Stability (h@10 mA cm <sup>-2</sup> ) | PEMWE performance                 | PEMWE Durability                    | Reference        |
|------------------------------------------------------|--------------------------------|---------------|------------------|---------------------------------------|-----------------------------------|-------------------------------------|------------------|
| <b>RuO<sub>2</sub>/0.5CeO<sub>2</sub></b>            | <b>impregnation-pyrolysis</b>  | \             | <b>214</b>       | <b>550</b>                            | <b>1.59 V@1 A cm<sup>-2</sup></b> | <b>300 h@500 mA cm<sup>-2</sup></b> | <b>This Work</b> |
| RuO <sub>2</sub> -CeO <sub>2</sub> -CC               | electrodeposit ion-calcination | Carbon cloth  | 180              | 1000                                  | N.A.                              | N.A.                                | 17               |
| RuO <sub>2</sub> /CeO <sub>2</sub> @C                | hydrothermal                   | Carbon sphere | 170              | 100                                   | 1.54 V@0.01 A cm <sup>-2</sup>    | 100 h@10 mA cm <sup>-2</sup>        | 18               |
| Ce-RuO <sub>2</sub>                                  | glucose-assisted pyrolysis     | \             | 191              | 25                                    | N.A.                              | N.A.                                | 19               |
| Ce-RuO <sub>2</sub>                                  | PVP-mediated pyrolysis         | \             | 226              | 20                                    | N.A.                              | N.A.                                | 20               |
| Ce@RuO <sub>2</sub> /CoNC                            | hydrothermal                   | CoNC          | 150              | 1000                                  | 1.56 V@0.2 A cm <sup>-2</sup>     | 1000 h@200 mA cm <sup>-2</sup>      | 21               |
| Ru <sub>3</sub> MoCeO <sub>x</sub>                   | glucose-assisted pyrolysis     | \             | 160              | 100                                   | N.A.                              | N.A.                                | 22               |
| Ru <sub>0.85</sub> Ce <sub>0.15</sub> O <sub>x</sub> | glucose-blowing method         | \             | 146              | 200                                   | 1.71 V@1 A cm <sup>-2</sup>       | 100 h@200 mA cm <sup>-2</sup>       | 23               |

## References

- 1 D. Zhang, Q. Wu, Y. Han, L. Wu, H. Dong, R. Zhang, N. Song, F. Zhu, Y. Fang, H. Liu, J. Chen, A. Du, K. K. Huang, P. Yuan and X. Yao, *J. Am. Chem. Soc.*, 2026, **148**, 1004–1012.
- 2 Z. Wu, L. Wang, Y. Kong, Q. Zhang, S. Ling, L. Chen, W. Wang, X. Luo, L. Yang, X. Du, F. Hu, S. Peng and Y. Yang, *Angew. Chemie - Int. Ed.*, DOI:10.1002/anie.202522216.
- 3 T. Yao, Q. Fu, K. Wang, Y. Xu, L. Lin, S. Ma, B. Lei, H. Wei, J. Zhong, Y. Li, X. Wang, P. Xu and B. Song,

- ACS Nano, 2026, **20**, 2510–2522.
- 4 M. Luo, L. Huang, C. Shen, T. Yang and C. Wang, *Carbon Energy*, 2025, 1–11.
- 5 G. Chen, Z. Shang, J. Zhang, X. Li, C. Ma, X. Wang, Y. Xiong and Y. Han, *Angew. Chemie - Int. Ed.*, DOI:10.1002/anie.202517073.
- 6 Y. Feng, L. Qian, K. Feng, B. Xu, J. Xu, C. Lu, W. Zhang, X. Feng, Z. Zuo and J. Zhong, *Small*, 2025, **10570**, 1–10.
- 7 T. Xu, Q. Liang, F. Liu, Z. Zhao, W. Li, A. Wei, M. Liu, K. Song, B. Yang, T. Dong, X. Zou, W. Zhang and W. Zheng, *Adv. Funct. Mater.*, 2025, **22894**, 1–11.
- 8 F. T. Dajan, Y. Wang, M. G. Sendeku, Y. Zhang, B. Wu, S. Hussain, M. Bahri, X. Zhan, Y. Li, X. Li and F. Wang, *Small*, 2025, **21**, 1–9.
- 9 L. Kong, D. Zhou, K. Tian, X. Shi, H. Yang, P. An, J. Zhang, Y. Ji, Y. Li, S. T. Lee, S. Liu and J. Yan, *Small*, 2025, **21**, 1–11.
- 10 Y. Yu, F. Liu, X. Liu, L. Li, B. Zhou, H. Liao, P. Tan and J. Pan, *Chem. Eng. J.*, 2025, **514**, 163295.
- 11 S. Zhao, Q. Dang, A. Cao, M. G. Sendeku, H. Liu, J. Peng, Y. Fan, H. Li, F. Wang, Y. Kuang and X. Sun, *ACS Nano*, 2025, **19**, 8773–8785.
- 12 Y. Jang, H. Kim, D. Park, S. Han, H. Jun, J. Park, S. Kim, Y. Jung, C. H. Choi, J. H. Jang, S. Lee and J. Lee, *Small*, 2025, **21**, 1–9.
- 13 X. Chen, M. Liu, C. Ni, Y. Chen, T. Liu, S. Li and H. Su, *Small*, 2025, **21**, 1–8.
- 14 S. Hao, M. Liu, J. Pan, X. Liu, X. Tan, N. Xu, Y. He, L. Lei and X. Zhang, *Nat. Commun.*, 2020, **11**, 1–11.
- 15 K. Wang, Y. Wang, B. Yang, Z. Li, X. Qin, Q. Zhang, L. Lei, M. Qiu, G. Wu and Y. Hou, *Energy Environ. Sci.*, 2022, **15**, 2356–2365.
- 16 J. Wang, H. Yang, F. Li, L. Li, J. Wu, S. Liu, T. Cheng, Y. Xu, Q. Shao and X. Huang, *Sci. Adv.*, 2022, **8**, 1–11.
- 17 H. Song, X. Yong, G. I. N. Waterhouse, J. Yu, H. Wang, J. Cai, Z. Tang, B. Yang, J. Chang and S. Lu, *ACS Catal.*, 2024, 3298–3307.
- 18 Y. Wu, R. Yao, K. Zhang, Q. Zhao, J. Li and G. Liu, *Chem. Eng. J.*, 2024, **479**, 147939.
- 19 J. Bai, L. Cheng, S. Liu, H. Zhang, Y. Lian, Y. Deng, Q. Zhou, Y. Tang and Y. Su, *Appl. Surf. Sci.*, 2024, **642**, 158613.
- 20 Y. Feng, Q. Li, R. Liu, Y. Li, C. Li, F. Luo and Z. Yang, *J. Alloys Compd.*, 2025, 184016.

- 21 F. O. Boakye, K. Harrath, D. Zhang, Y. You, W. Zhang, Z. Wang, H. Zhang, J. Zhu, J. Long, J. Zhu and others, *Adv. Funct. Mater.*, 2024, **34**, 2408714.
- 22 J. He, W. Li, P. Xu and J. Sun, *Appl. Catal. B Environ.*, 2021, **298**, 120528.
- 23 Y. Tao, R. Zhang, Y. Zhu, J. Chen, W. Weng, Y. He and Z. Wang, *Chem. Eng. J.*, 2025, 168646.
